# Supplementary material for: Role of tea plantations in the maintenance of bird diversity in Anji County, China
Source: PeerJ. 2023 Feb 13;11:e14801. doi: 10.7717/peerj.14801 (PMC9933740; doi:10.7717/peerj.14801)
Supplement: Supplemental Information 1 [file peerj-11-14801-s001.xlsx]

## Sheet: Sheet1
Family	Species	Guild
Phasianidae	Chinese Bamboo Partridge Bambusicola thoracicus	Nature-dependency
Coraciidae	Oriental Dollarbird Eurystomus orientalis	Nature-dependency
Ardeidae	Chinese Pond Heron Ardeola bacchus	Nature-dependency
Ardeidae	Eastern Cattle Egret Bubulcus coromandus	Nature-dependency
Ardeidae	Little Egret Egretta garzetta	Nature-dependency
Accipitridae	Crested Goshawk Accipiter trivirgatus	Nature-dependency
Accipitridae	Black Kite Milvus migrans	Nature-dependency
Accipitridae	Grey-faced Buzzard Butastur indicus	Nature-dependency
Rallidae	Common Moorhen Gallinula chloropus	Urban-dependency
Columbidae	Oriental Turtle Dove Streptopelia orientalis	Nature-dependency
Columbidae	Spotted Dove Spilopelia chinensis	Urban-dependency
Laniidae	Long-tailed Shrike Lanius schach	Nature-dependency
Corvidae	Red-billed Blue Magpie Urocissa erythroryncha	Urban-dependency
Corvidae	Oriental Magpie Pica serica	Urban-dependency
Corvidae	Collared Crow Corvus torquatus	Nature-dependency
Paridae	Japanese Tit Parus minor	Urban-dependency
Pycnonotidae	Light-vented Bulbul Pycnonotus sinensis	Urban-dependency
Hirundinidae	Barn Swallow Hirundo rustica	Urban-dependency
Hirundinidae	Red-rumped Swallow Cecropis daurica	Nature-dependency
Cettiidae	Rufous-faced Warbler Abroscopus albogularis	Nature-dependency
Cettiidae	Brownish-flanked Bush Warbler Horornis fortipes	Urban-dependency
Timaliidae	Streak-breasted Scimitar Babbler Pomatorhinus ruficollis	Nature-dependency
Leiothrichidae	White-browed Laughingthrush Pterorhinus sannio	Nature-dependency
Leiothrichidae	Masked Laughingthrush Pterorhinus perspicillatus	Nature-dependency
Zosteropidae	Swinhoe's White-eye Zosterops simplex	Nature-dependency
Sturnidae	Crested Myna Acridotheres cristatellus	Urban-dependency
Sturnidae	Red-billed Starling Spodiopsar sericeus	Urban-dependency
Turdidae	Chinese Blackbird Turdus mandarinus	Urban-dependency
Muscicapidae	Oriental Magpie Robin Copsychus saularis	Urban-dependency
Muscicapidae	White-crowned Forktail Enicurus leschenaulti	Nature-dependency
Muscicapidae	Plumbeous Water Redstart Phoenicurus fuliginosus	Nature-dependency
Cinclidae	Brown Dipper Cinclus pallasii	Nature-dependency
Passeridae	Eurasian Tree Sparrow Passer montanus	Urban-dependency
Estrildidae	Scaly-breasted Munia Lonchura punctulata	Nature-dependency
Estrildidae	White-rumped Munia Lonchura striata	Nature-dependency
Motacillidae	White Wagtail Motacilla alba	Urban-dependency
Fringillidae	Grey-capped Greenfinch Chloris sinica	Nature-dependency
